# Supplementary material for: Zinc(ii) complexes with the quinolone antibacterial drug flumequine: structure, DNA- and albumin-binding
Source: Royal Society of Chemistry journal article supplement (doi:10.1039/c2nj40798a), 2012-10-17
Supplement: c2nj40798a.pdf [file c2nj40798a.pdf]

## Zinc(II) complexes with the quinolone antibacterial drug flumequine: Structure, DNA- and albumin- binding

Alketa Tarushi<sup>1</sup>, Jakob Kljun<sup>3</sup>, Iztok Turel<sup>3</sup>, Anastasia A. Pantazaki<sup>2</sup>, George Psomas<sup>1</sup>,  
Dimitris P. Kessissoglou<sup>1,\*</sup>

<sup>1</sup>Laboratory of Inorganic Chemistry, Faculty of Chemistry, Aristotle University of Thessaloniki, GR-54124 Thessaloniki, GREECE

<sup>2</sup>Laboratory of Biochemistry, Faculty of Chemistry, Aristotle University of Thessaloniki, GR-54124 Thessaloniki, GREECE

<sup>3</sup>Faculty of Chemistry and Chemical Technology, University of Ljubljana, Askerceva 5, 1000 Ljubljana, SLOVENIA.

### Supplementary material

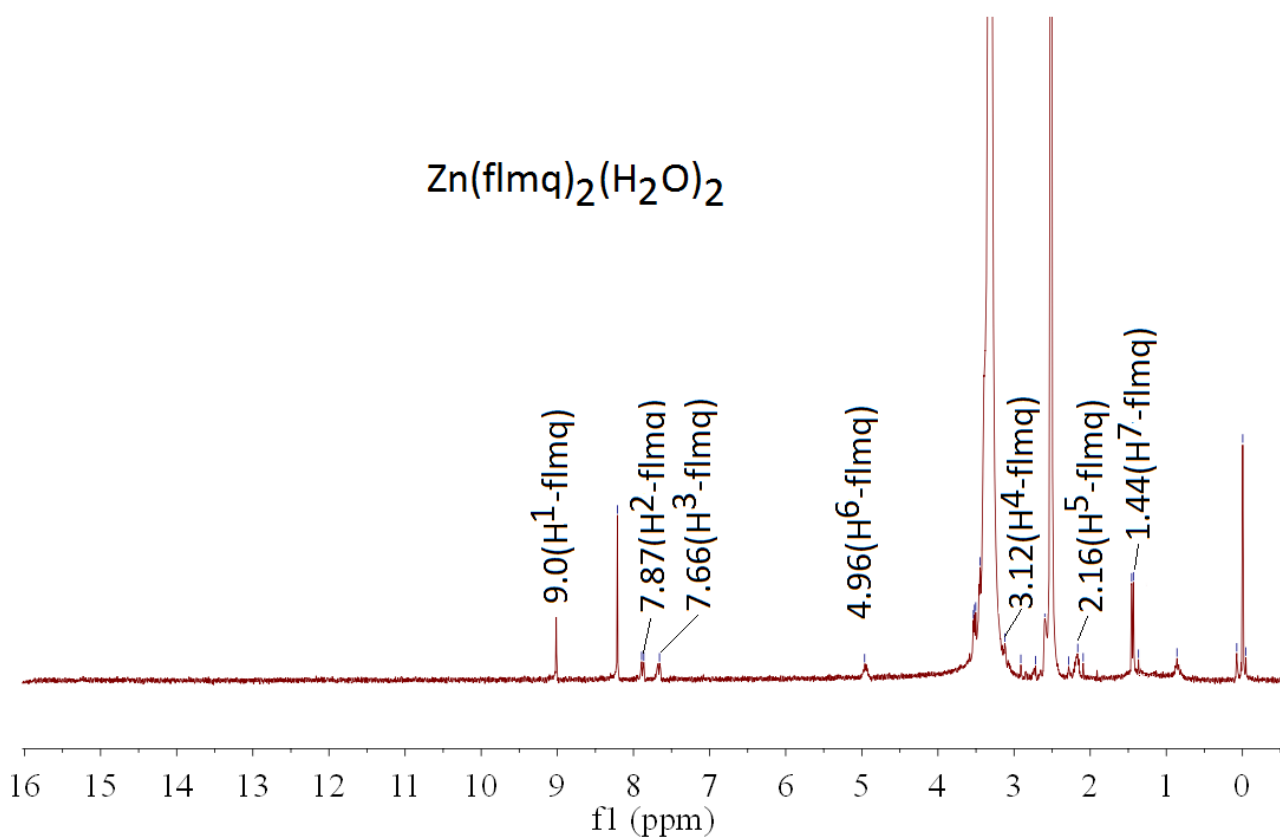

**Figure S1.** <sup>1</sup>H-NMR spectrum of [Zn(flmq)<sub>2</sub>(H<sub>2</sub>O)<sub>2</sub>], **1**, in d<sub>6</sub>-DMSO/CDCl<sub>3</sub> (5:1) solution.

\* Corresponding author: Prof. D.P. Kessissoglou, Tel.:+30+2310997723; Fax:+30+2310997738; E-mail: kessisog@chem.auth.gr

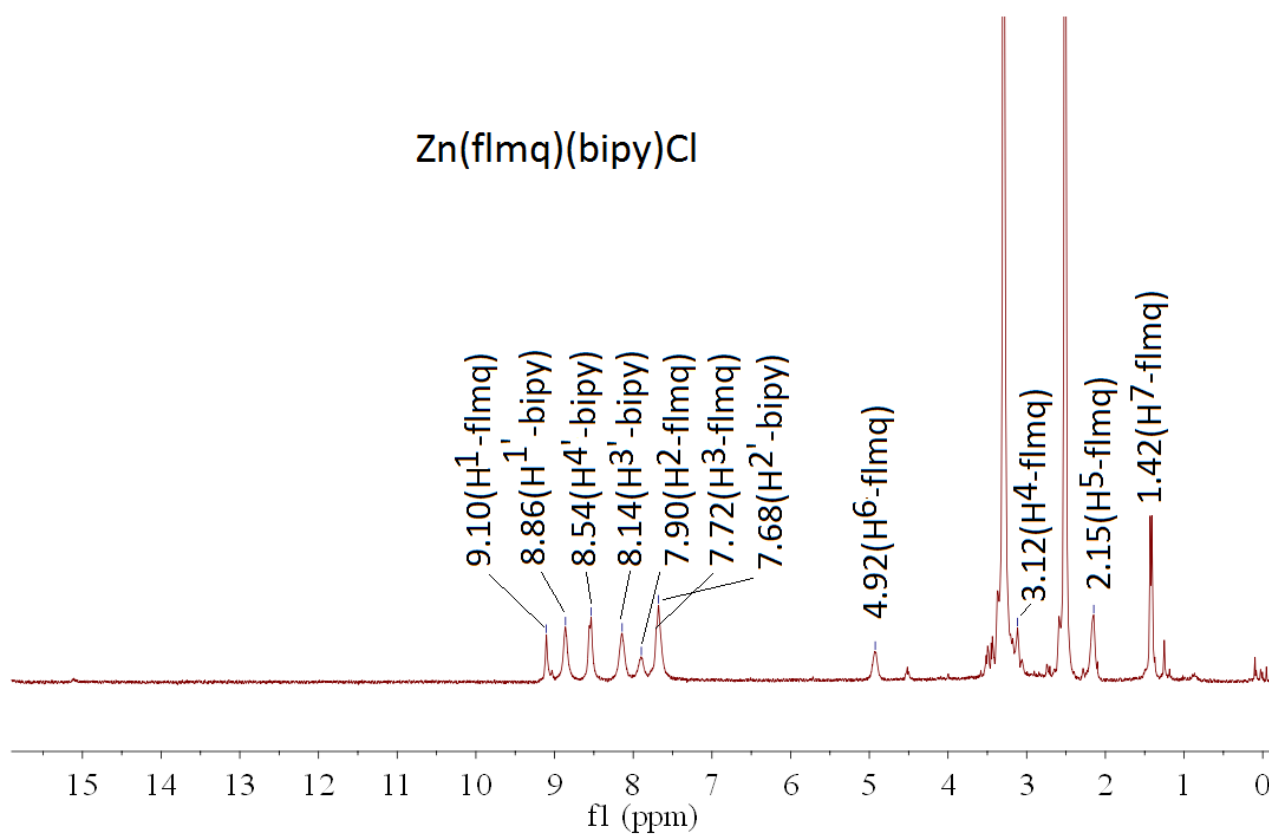

**Figure S2.** <sup>1</sup>H-NMR spectrum of [Zn(flmq)(bipy)Cl], **2**, in d<sub>6</sub>-DMSO solution.

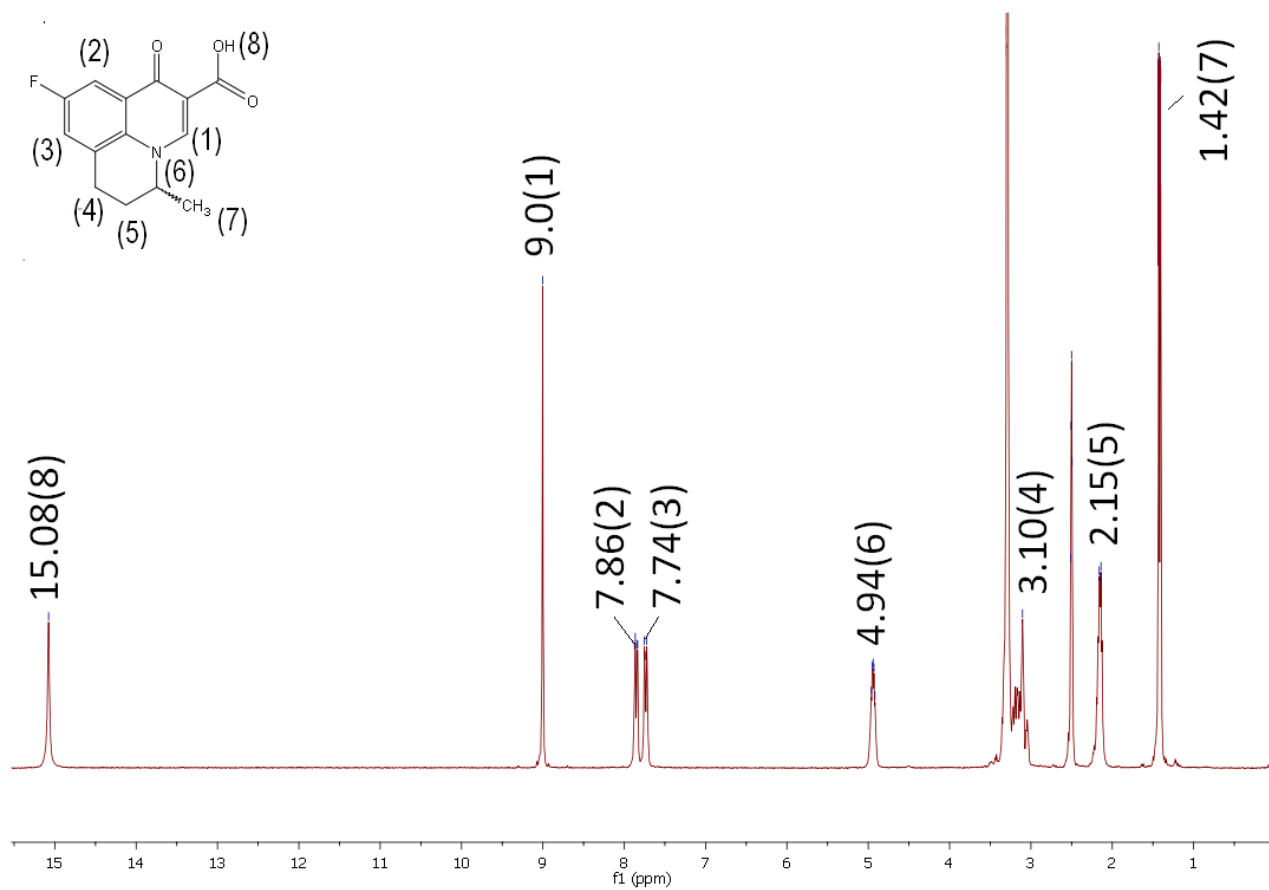

**Figure S3.** <sup>1</sup>H-NMR spectrum of Hflmq in d<sub>6</sub>-DMSO/CHCl<sub>3</sub> (5:1) solution.

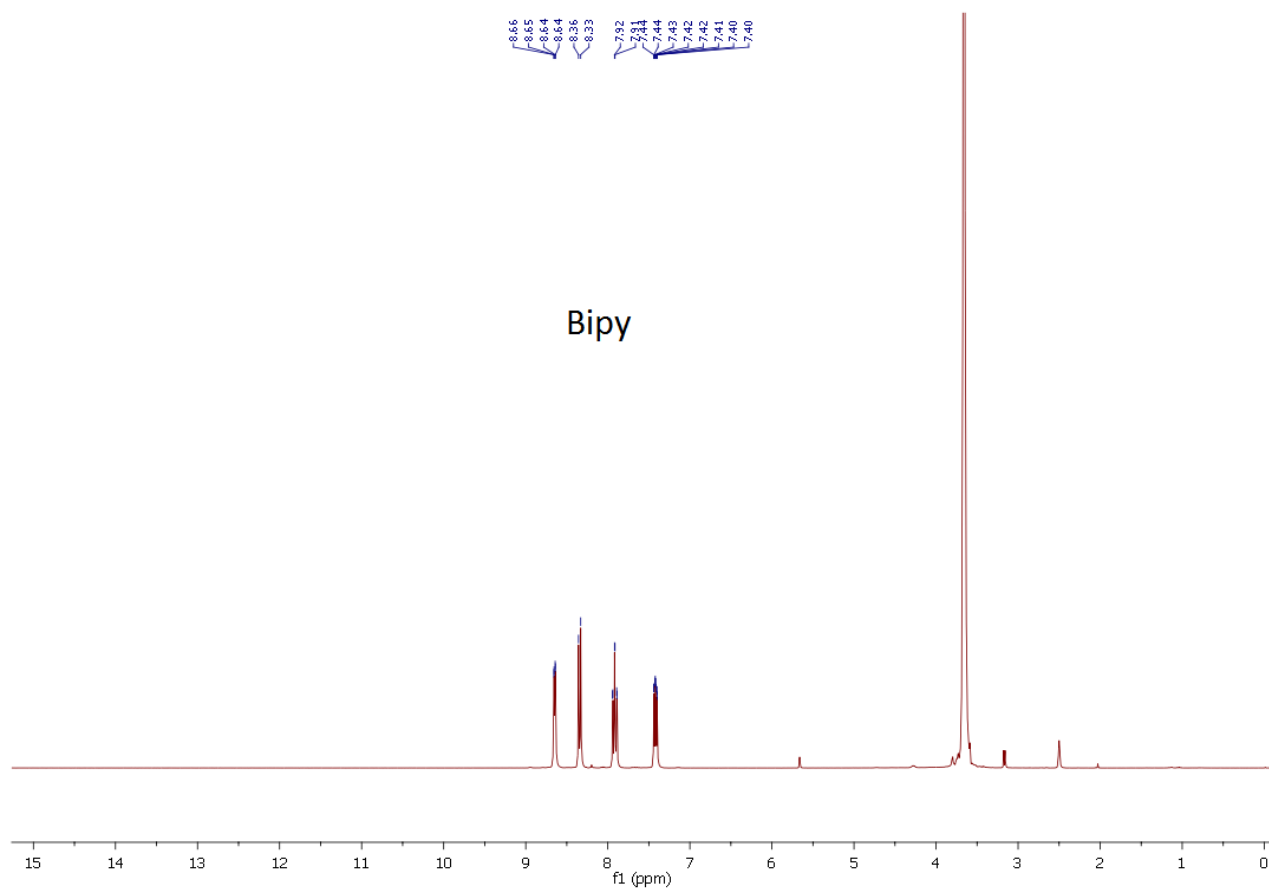

**Figure S4.**  $^1\text{H}$ -NMR spectrum of bipy in  $\text{d}_6$ -DMSO solution.

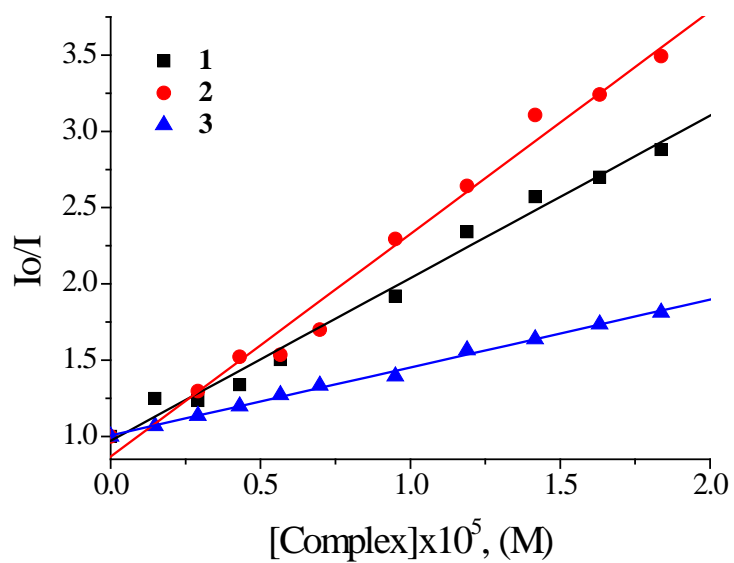

**Figure S5.** Stern-Volmer quenching plot of BSA for complexes **1-3**.

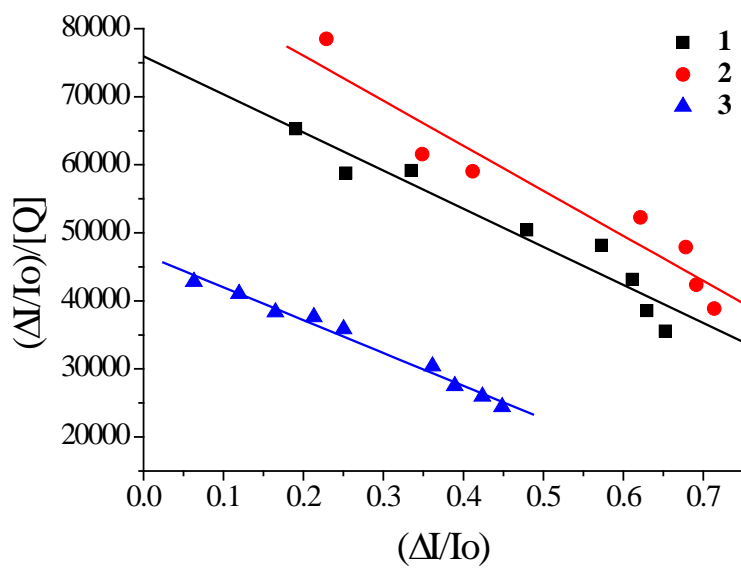

**Figure S6.** Scatchard plot of BSA for complexes **1-3**.

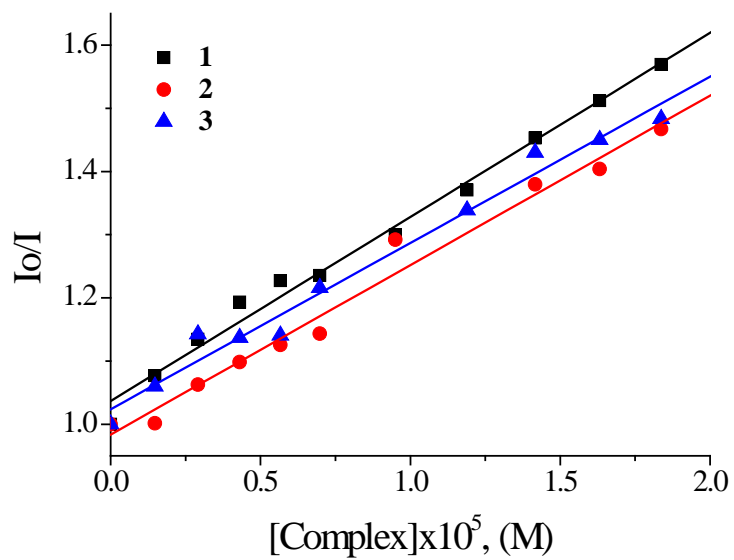

**Figure S7.** Stern-Volmer quenching plot of HSA for complexes **1-3**.

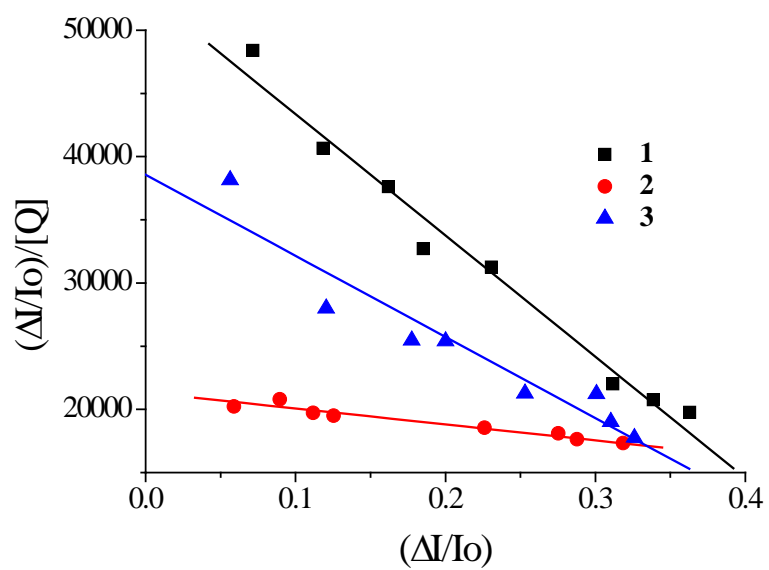

**Figure S8.** Scatchard plot of HSA for complexes **1-3**.

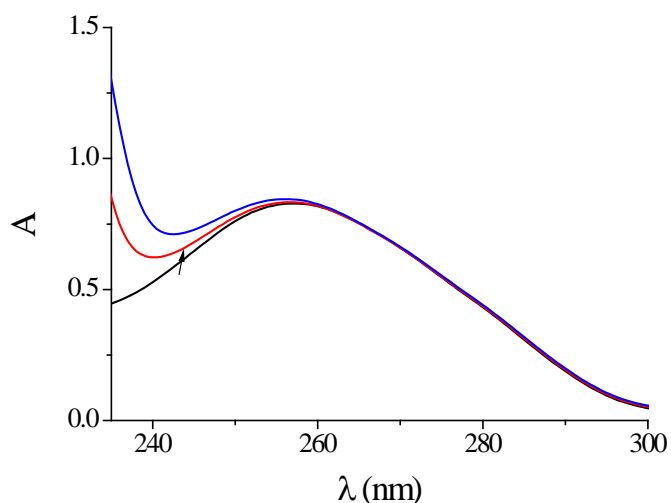

**Figure S9.** (A) UV spectra of CT DNA in buffer solution (150 mM NaCl and 15 mM trisodium citrate at pH 7.0) in the absence or presence of  $[\text{Zn}(\text{flmq})(\text{bipy})\text{Cl}]$ , **2**. The arrows show the changes upon increasing amounts of the complex.

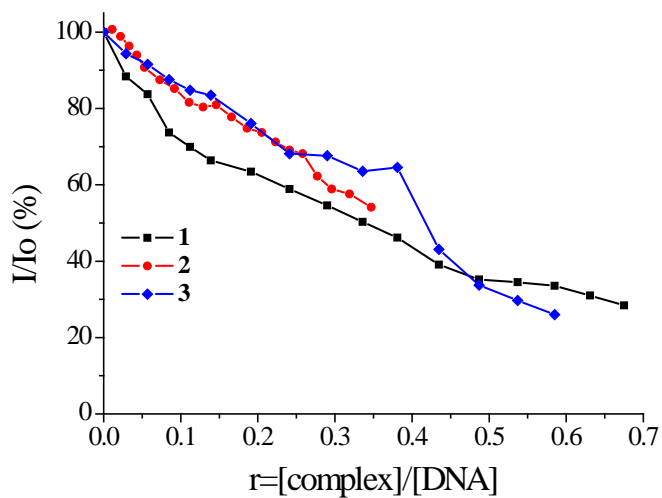

**Figure S10.** Plot of EB relative fluorescence intensity at  $\lambda_{\text{em}}=592$  nm ( $I/I_0\%$ ) vs  $r$  ( $r=[\text{complex}]/[\text{DNA}]$ ) for complexes **1-3** in buffer solution (150 mM NaCl and 15 mM trisodium citrate at pH 7.0).

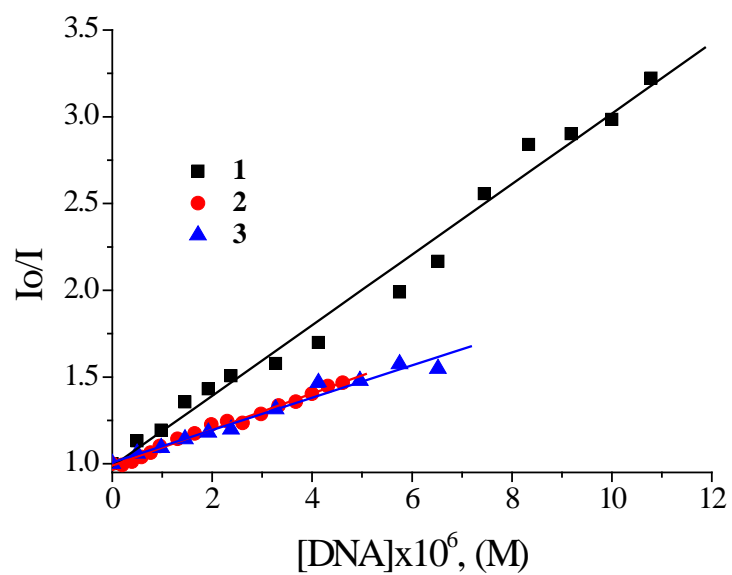

**Figure S11.** Stern-Volmer quenching plot of EB bound to CT DNA for complexes **1-3**.
